# Supplementary material for: Hyperreflective foci in predicting the treatment outcomes of diabetic macular oedema after anti-vascular endothelial growth factor therapy
Source: PubMed Central journal article supplement (PMC7930178; doi:10.1038/s41598-021-84553-7), 2021-03-03
Supplement: 41598_2021_84553_MOESM1_ESM.pdf [file 41598_2021_84553_MOESM1_ESM.pdf]

## Supplementary Information

### Hyperreflective Foci in Predicting the Treatment Outcomes of Diabetic Macular Oedema After Anti-vascular Endothelial Growth Factor Therapy

Chu-Hsuan Huang,<sup>1</sup> Chang-Hao Yang,<sup>2,3</sup> Yi-Ting Hsieh,<sup>2</sup> Chung-May Yang,<sup>2,3</sup> Tzyy-Chang Ho,<sup>2</sup> Tso-Ting Lai<sup>2,4\*</sup>

1 Department of Ophthalmology, Cathay General Hospital, Taipei, Taiwan

2 Department of Ophthalmology, National Taiwan University Hospital, Taipei, Taiwan

3 Department of Ophthalmology, College of Medicine, National Taiwan University, Taipei, Taiwan

4 Graduate Institute of Clinical Medicine, College of Medicine, National Taiwan University, Taipei, Taiwan

\*Corresponding Author:

Tso-Ting Lai, MD

Department of Ophthalmology, National Taiwan University Hospital, Taipei, Taiwan;

Graduate Institute of Clinical Medicine, College of Medicine, National Taiwan

University, Taipei, Taiwan

No 7, Chung-Shan S. Rd., Taipei, 100, Taiwan.

Office voice: 886-2-23123456 ext 65205

E-mail: [b91401005@ntu.edu.tw](mailto:b91401005@ntu.edu.tw)

### Supplementary Table S1

**Predicting factors for best-corrected visual acuity improvement and central foveal thickness reduction at 1 year in patients with diabetic macular oedema under anti-vascular endothelial growth factor therapy.**

|                                                      | VA change at the 12 <sup>th</sup> month |               | CFT Change at the 12 <sup>th</sup> month |               |
|------------------------------------------------------|-----------------------------------------|---------------|------------------------------------------|---------------|
|                                                      | P-value                                 | Coefficient   | P-value                                  | Coefficient   |
| Age                                                  | 0.395                                   | 0.002         | 0.096                                    | 1.41          |
| Sex (Female =1)                                      | 0.524                                   | 0.049         | 0.312                                    | 16.17         |
| HbA1c                                                | 0.189                                   | -0.034        | 0.926                                    | -0.660        |
| Hypertension                                         | <b>0.001</b>                            | <b>0.209</b>  | 0.878                                    | 2.49          |
| Pseudophakia                                         | 0.698                                   | 0.027         | 0.710                                    | -6.83         |
| Previous treatment                                   | <b>0.031</b>                            | <b>0.136</b>  | 0.761                                    | 5.32          |
| Proliferative diabetic retinopathy                   | 0.156                                   | 0.094         | 0.919                                    | -1.83         |
| Hard exudate                                         | 0.201                                   | -0.074        | <b>0.014</b>                             | <b>-38.18</b> |
| Drug type (Aflibercept=1)                            | 0.241                                   | 0.070         | <b>0.030*</b>                            | <b>34.83</b>  |
| Baseline VA (LogMAR)                                 | <b>&lt;0.001</b>                        | <b>-0.337</b> | 0.055                                    | -50.49        |
| Baseline CFT                                         | 0.805                                   | 0.000067      | <b>&lt;0.001</b>                         | <b>-0.834</b> |
| Baseline epiretinal membrane                         | <b>0.048</b>                            | <b>0.123</b>  | <b>0.001</b>                             | <b>54.23</b>  |
| Baseline intraretinal cyst                           | 0.133                                   | 0.126         | 0.771                                    | 6.95          |
| Baseline subretinal fluid                            | <b>0.001</b>                            | <b>-0.209</b> | <b>0.001</b>                             | <b>-61.33</b> |
| Baseline HRF in the inner retina                     | 0.285                                   | -0.018        | <b>0.033</b>                             | <b>-9.69</b>  |
| Baseline HRF in the outer retina                     | <b>0.037</b>                            | <b>-0.007</b> | <b>&lt;0.001</b>                         | <b>-4.03</b>  |
| VA at the 3 <sup>rd</sup> month (LogMAR)             | <b>&lt;0.001</b>                        | <b>0.711</b>  | 0.202                                    | -29.37        |
| CFT at the 3 <sup>rd</sup> month                     | <b>0.05</b>                             | <b>0.001</b>  | <b>&lt;0.001</b>                         | <b>0.72</b>   |
| IVIs at the 3 <sup>rd</sup> month                    | 0.567                                   | -0.042        | 0.248                                    | -25.35        |
| IVIs at the 6 <sup>th</sup> month                    | 0.419                                   | 0.025         | 0.747                                    | -4.01         |
| IVIs at the 12 <sup>th</sup> month                   | 0.749                                   | -0.005        | 0.410                                    | -3.47         |
| HRF in the inner retina at the 3 <sup>rd</sup> month | 0.645                                   | -0.009        | 0.493                                    | -3.86         |
| HRF in the outer retina at the 3 <sup>rd</sup> month | <b>0.024</b>                            | <b>-0.01</b>  | <b>0.009</b>                             | <b>-3.06</b>  |

VA: visual acuity, CFT: central foveal thickness, IVIs: Intravitreal injections, HRF: hyperreflective foci.

\*corrected with presence of epiretinal membrane at baseline: p = 0.131
